# Supplementary material for: Common Variants of Drosophila melanogaster Cyp6d2 Cause Camptothecin Sensitivity and Synergize With Loss of Brca2
Source: PubMed Central journal article supplement (PMC3538347; doi:10.1534/g3.112.003996), 2013-01-01
Supplement: supp_3.1.91_003996SI.pdf [file supp_3.1.91_003996SI.pdf]

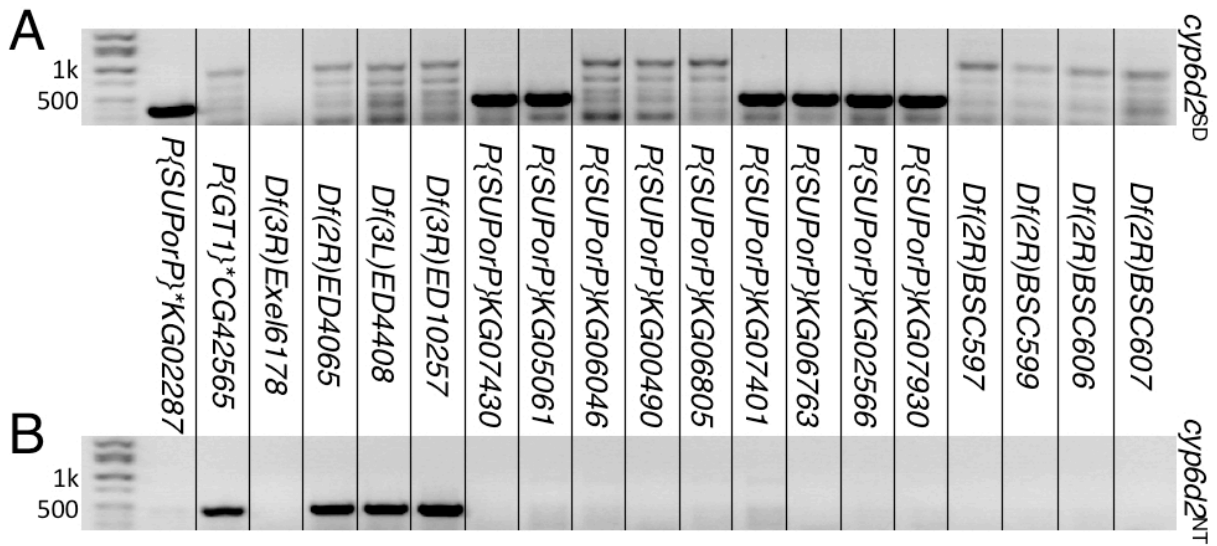

**Figure S1** Sample allele-specific PCR gel. (\*) indicates a precise excision of the insertion shown. Both PCR products are around 400 bp (see Materials and Methods). Sizes of molecular weight markers are indicated. (A) Allele-specific PCR gel for *cyp6d2<sup>SD</sup>* mutation. *P{SUPorP}\*KG02287* serves as a positive control. (B) Allele-specific PCR gel for *cyp6d2<sup>NT</sup>* mutation. *P{GT1}\*CG42565* serves as a positive control.

WT -277 AAGAACCACATTCTATTTGGGGTCAACATATTGAAAGCATAATGATATGCTGTTGATATC  
SD AAGAACCACATTCTATTTGGGGTCAACATATTGAAAGCATAATGATATGCTGTTGATATC  
NT AAGAACCACATTCTATTTGGGGTCAACATATTGAAAGCATAATGATATGCTGTTGAAATC  
\*\*\*\*\* \*\*

WT -217 ATATACCTTTGAAATTAGTTGTGCATTTCTGTAATGTGCTCAACAGGTAGTCTCTTTGCT  
SD ATATACCTTTGAAATTAGTTGTGCATTTCTGTAATGTGCTCAACAGGTAGTCTCTTTGCT  
NT ATATACCTTTGAAATTAGTTGTGCATTTCTGTCATGGGCTCAACAGGTAGTCTCTTTGCT  
\*\*\*\*\* \*\*

WT -157 TTTTGCCGCCCTGCTTCCCTTGAAGAGTCGAAAGCTTTTTCCAGCTGAGAAGTCACTTGT  
SD TTTTGCCGCCCTGCT--CCCTGAAAGAGTCGAAAGCTTTTTCCAGCTGAGAAGTCACTTGT  
NT TTTTGCCGCCCTGCTTCCCTTGAAGAGTCGAAAGCTTTTTCCAGCTGAGAAGTCACTTGT  
\*\*\*\*\*

WT -97 TGATTTGCTGGAAGAGCAGCAGAGTCCAGAGAAAAAGACTCGGTTGTTGTAGCGCTTAT  
SD TGATTTGCTGGAAGAGCAGCAGAGTCCAGAGAAAAAGACTCGGTTGTTGTAGCGCTTAT  
NT TGATTTGCTGGAAGAGCAGCAGAGTCCAGAGAAAAAGACTCGGTTGTTGTAGCGCTTAT  
\*\*\*\*\*

WT -37 CGCGGGTTCTACGTCTATATAAGACCGATGCTCATGCAGTCTGAATTGTACAGTTTGAAG  
SD CGCGGGTTCTACGTCTATATAAGACCGATGCTCATGCAGTCTGAATTGTACAGTTTGAAG  
NT CGCGGGTTCTACGTCTATATAAGACCGATGCTCATGCAGTCTGAATTGTACAGTTTGAAG  
\*\*\*\*\*

WT 24 GTGTGCATCGAGTAGTTTCGCAAATATTTACCACCTTTTAGAAATTGTTCGATTTTCAATAC  
SD GTGTGCATCGAGTAGTTTCGCAAATATTTACCACCTTTTAGAAATTGTTCGATTTTCAATAC  
NT GTGTGCATCGAGTAGTTTCGCAAATATTTACCACCTTTTAGAAATTGTTCGATTTTCAATAC  
\*\*\*\*\*

WT 84 CAAAAGTTAGACTAGAGATTCTCAATATGTGGACCATTCCTCGACGATCCTAATCGCGG  
SD CAAAAGTTAGACTAGAGATTCTCGATATGTGGACCATTCCTCGACGATCCTAATCGCGG  
NT CAAAAGTTAGACTAGAGATTCTCAATATGTGGACCATTCCTCGACGATCCTAATCGCGG  
\*\*\*\*\*

WT 144 GTCTGCTGTACAGATATGTGAAGCGGCACTACACTCACTGGCAGCGATTGGGAGTCGATG  
SD GTCTGCTGTACAGATATGTGAAGCGGCACTACACTCACTGGCAGCGATTGGGAGTCGATG  
NT GTCTGCTGTACAGATATGTGAAGCGGCACTACACTCACTGGCAGCGATTGGGAGTCGATG  
\*\*\*\*\*

WT 204 AGGAGCCGGCAAAGATTCCCTTTGGCGTAATGGATACTGTCATGAAGCAGGAACGAAGTT  
SD AGGAGCCGGCAAAGATTCCCTTTGGCGTAATGGATACTGTCATGAAGCAGGAACGAAGTT  
NT AGGAGCCGGCAAAGATTCCCTTTGGCGTAATGGATACTGTCATGAAGCAGGAACGAAGTT  
\*\*\*\*\*

WT 264 TGGGCATGGCTCTGGCTGATATATACGCCCGGCACGAGGGCAAATCGTTGGCATATACA  
SD TGGGCATGGCTCTGGCTGATATATACGCCCGGCACGAGGGCAAATCGTTGGCATATACA  
NT TGGGCATGGCTCTGGCTGATATATACGCCCGGCACGAGGGCAAATCGTTGGCATATACA  
\*\*\*\*\*

WT 324 TGTGTAACAAACGAAGTATCCTGATCCGAGATGCCCAATTGGCTCGCCAAATCATGACCA  
SD TGTGTAACAAACGAAGTATCCTGATCCGAGATGCCCAATTGGCTCGCCAAATCATGACCA  
NT TGTGTAACAAACGAAGTATCCTGATCCGAGATGCCCAATTGGCTCGCCAAATCATGACCA  
\*\*\*\*\*

WT 384 GCGATTTCCGAGTTTCCACGATCGCGGGGTGTACGTGGACGAGGATAAGGACCCGTTGT  
SD GCGATTTCCGAGTTTCCACGATCGCGGGGTGTACGTGGACGAGGATAAGGACCCGTTGT  
NT GCGATTTCCGAGTTTCCACGATCGCGGGGTGTACGTGGACGAGGATAAGGACCCGTTGT  
\*\*\*\*\*

WT 444 CGGCCAACCTTTTTAACCTAAGAGGTGCTTCATGGCGAAATCTACGTCAGAACTTACGC  
SD CGGCCAACCTTTTTAACCTAAGAGGTGCTTCATGGCGAAATCTACGTCAGAACTTACGC  
NT CGGCCAACCTTTTTAACCTAAGAGGTGCTTCATGGCGAAATCTACGTCAGAACTTACGC  
\*\*\*\*\*

WT 504 CGTCGTTCTCCTCCGGCAAATAAAGGGCATGTTCCGGCACCATCGACGACGTGGGCGATA  
SD CGTCGTTCTCCTCCGGCAAATAAAGGGCATGTTCCGGCACCATCGACGACGTGGGCGATA  
NT CGTCGTTCTCCTCCGGCAAATAAAGGGCATGTTCCGGCACCATCGACGACGTGGGCGATA  
\*\*\*\*\*

WT 564 AGTTGGTGCAGCATTTGGAGGGGGCCCTTGACCAAAGCGATGAAGTGGAGATCAAGGATG  
SD AGTTGGTGCAGCATTTGGAGGGGGCCCTTGACCAAAGCGATGAAGTGGAGATCAAGGATG  
NT AGTTGGTGCAGCATTTGGAGGGGGCCCTTGACCAAAGCGATGAAGTGGAGATCAAGGATG  
\*\*\*\*\*

WT 624 TGATGACCACGTATGCGGTGGACATCATTGGGTCAGTCATTTTTGGCTTGGAGATAGACA  
SD TGATGACCACGTATGCGGTGGACATCATTGGGTCAGTCATTTTTGGCTTGGAGATAGACA  
NT TGATGACCACGTATGCGGTGGACATCATTGGGTCAGTCATTTTTGGCTTGGAGATAGACA  
\*\*\*\*\*

WT 684 GCTTCCGAAATCCAAAAAACGAGTTCCGCGAGATCAGCAGCTCTACGTCTAGGGATGAAT  
SD GCTTCCGAAATCCAAAAAACGAGTTCCGCGAGATCAGCAGCTCTACGTCTAGGGATGAAT  
NT GCTTCCGAAATCCAAAAAACGAGTTCCGCGAGATCAGCAGCTCTACGTCTAGGGATGAAT  
\*\*\*\*\*

WT 744 CTCTGCTGCTGAAGATTCACAATATGTCCATGTTTCATTTGTCCACCgtgagttcaaaaat  
SD CTCTGCTGCTGAAGATTCACAATATGTCCATGTTTCATTTGTCCACCgtgagttcaaaaat  
NT CTCTGCTGCTGAAGATTCACAATATGTCCATGTTTCATTTGTCCACCgtgagttcaaaaat  
\*\*\*\*\*

WT 804 aaccagggtatataatgggaatctttatctatatttataactaaatgttacagG  
SD aaccagggtatataatgggaatctttatctatatttataactaaatgttacagG  
NT aaccagggtatataatgggaatctttatctatatttataactaaatgttacagG  
\*\*\*\*\*

WT 864 ATTGCTAAGCTAATGAACCGCTTGGGCTACGAAAGCCGCATTCCTGACATCCCTGCGAGAC  
SD ATTGCTAAGCTAATGAACCGCTTGGGCTACGAAAGCCGCATTCCTGACATCCCTGCGAGAC  
NT ATTGCTAAGCTAATGAACCGCTTGGGCTACGAAAGCCGCATTCCTGACATCCCTGCGAGAC  
\*\*\*\*\*

WT 924 ATGATGAAGCGCACAATCGAGTTCCGGGAGGAGCACAACGTGGTGCGAAAGGACATGCTG  
SD ATGATGAAGCGCACAATCGAGTTCCGGGAGGAGCACAACGTGGTGCGAAAGGACATGCTG  
NT ATGATGAAGCGCACAATCGAGTTCCGGGAGGAGCACAACGTGGTGCGAAAGGACATGCTG  
\*\*\*\*\*

WT 984 CAGCTGCTGATCCGCCCTCCGAAATACGGGCAAGATTGGCGAGGACGACGACCAGGTGTGG  
SD CAGCTGCTGATCCGCCCTCCGAAATACGGGCAAGATTGGCGAGGACGACGACCAGGTGTGG  
NT CAGCTGCTGATCCGCCCTCCGAAATACGGGCAAGATTGGCGAGGACGACGACCAGGTGTGG  
\*\*\*\*\*

WT 1044 GACATGGAAACCGCACAGGAGCAGCTGAAGTCTATGTTCGATCGAGAAGATTGCCGCCAG  
SD GACATGGAAACCGCACAGGAGCAGCTGAAGTCTATGTTCGATCGAGAAGATTGCCGCCAG  
NT GACATGGAAACCGCACAGGAGCAGCTGAAGTCTATGTTCGATCGAGAAGATTGCCGCCAG  
\*\*\*\*\*

WT 1104 GCATTCTGTTCTACGTGGCGGGCTCGGAATCCACAGCTGCGGCGTCTGCCTTCACTCTC  
SD GCATTCTGTTCTACGTGGCGGGCTCGGAATCCACAGCTGCGGCGTCTGCCTTCACTCTC  
NT GCATTCTGTTCTACGTGGCGGGCTCGGAATCCACAGCTGCGGCGTCTGCCTTCACTCTC  
\*\*\*\*\*

WT 1164 TACGAGCTGTCCATGTATCCGGAAGTGTGAAGGAGGCGCAAGAAGAAGTGGATGCTGTG  
SD TACGAGCTGTCCATGTATCCGGAAGTGTGAAGGAGGCGCAAGAAGAAGTGGATGCTGTG  
NT TACGAGCTGTCCATGTATCCGGAAGTGTGAAGGAGGCGCAAGAAGAAGTGGATGCTGTG  
\*\*\*\*\*

WT 1224 CTGATGAAGCACAATCTGAAGCCCAAGGATAGGTTACCTACGAGGCGGTGCAGGACTTA  
SD CTGATGAAGCACAATCTGAAGCCCAAGGATAGGTTACCTACGAGGCGGTGCAGGACTTA  
NT CTGATGAAGCACAATCTGAAGCCCAAGGATAGGTTACCTACGAGGCGGTGCAGGACTTA

```

*****
WT 1284 AAGTTTCTGGACATCTGCATCATGGgtgggtttcacatagcattcagtttcaacgatcct
SD AAGTTTCTGGACATCTGCATCATGGgtgggtttcacatagcattcagtttcaacgatcct
NT AAGTTTCTGGACATCTGCATCATGGgtgggtttcacatagcattcagtttcaacgatcct
*****

WT 1344 tagttaaacgtatTTTTTgcagAAACCATTCGCAAATACCCCGGGCTACCATTCTCAATC
SD tagttaaacgtatTTTTTgcagAAACCATTCGCAAATACCCCGGGCTACCATTCTCAATC
NT tagttaaacgtatTTTTTgcagAAACCATTCGCAAATACCCCGGGCTACCATTCTCAATC
*****

WT 1404 GAGAGTGCACCGAAGATTATCCCGTACCTGGAAC TAATCACATCATAGCCAAGGGAACAC
SD GAGAGTGCACCGAAGATTATCCCGTACCTGGAAC TAATCACATCATAGCCAAGGGAACAC
NT GAGAGTGCACCGAAGATTATCCCGTACCTGGAAC TAATCACATCATAGCCAAGGGAACAC
*****

WT 1464 CCATTCTGATCTCGCTCTTTGGCATGCAGCGTGATCCCGTCTATTTTCCCAATCCCAATG
SD CCATTCTGATCTCGCTCTTTGGCATGCAGCGTGATCCCGTCTATTTTCCCAATCCCAATG
NT CCATTCTGATCTCGCTCTTTGGCATGCAGCGTGATCCCGTCTATTTTCCCAATCCCAATG
*****

WT 1524 GCTACGATCCCCATCGCTTCGATTCAAATAACATGAACTACGATCAGGCAGCTTATATGC
SD GCTACGATCCCCATCGCTTCGATTCAAATAACATGAACTACGATCAGGCAGCTTATATGC
NT GCTACGATCCCCATCGCTTCGATTCAATAACATGAACTACGATCAGGCAGCTTATATGC
*****

WT 1584 CTTTGGAGAGGGTCCTAGGCACTGCATAGgtaaagatgtgtttgtaccagtggctcttg
SD CTTTGGAGAGGGTCCTAGGCACTGCATAGgtaaagatgtgtttgtaccagtggctcttg
NT CTTTGGAGAGGGTCCTAGGCACTGCATAGgtaaagatgtgtttgtaccagtggctcttg
* *****

WT 1644 tcttcttctgatcctgttctcttaattctttgccccaaagCTCTTCGCATGGGAAAAGTC
SD tcttcttctgatcctgttctcttaattctttgccccaaagCTCTTCGCATGGGAAAAGTC
NT tcttcttctgatcctgttctcttaattctttgccccaaagCTCTTCGCATGGGAAAAGTC
*****

WT 1704 AACTCCAAGGTGGCGGTGGCTAAGATTTTGGCCAATTTTGATCTGGTTCAATCTCCACGC
SD AACTCCAAGGTGGCGGTGGCTAAGATTTTGGCCAATTTTGATCTGGTTCAATCTCCACGC
NT AACTCCAAGGTGGCGGTGGCTAAGATTTTGGCCAATTTTGATCTGGTTCAATCTCCACGC
*****

WT 1764 AAGGAGGTGGAGTTCCGTTTCGATGCCGCCCTGTTTTAGTGACCAAGGAGCCGTTGAAG
SD AAGGAGGTGGAGTTCCGTTTCGATGCCGCCCTGTTTTAGTGACCAAGGAGCCGTTGAAG
NT AAGGAGGTGGAGTTCCGTTTCGATGCCGCCCTGTTTTAGTGACCAAGGAGCCGTTGAAG
*****

WT 1824 CTGCGCTTGACCAAGAGAAAAGTAAATCAAAAATATGTGGCTATTGTATG-----TAA
SD CTGCGCTTGACCAAGAGAAAAGTAAATCAAAAATATGTGGCTATTGTATG-----TAA
NT CTGCGCTTGACCAAGAGAAAAGTAAATCAAAAATATGTGGCTAAAAGCGAATATACTATAT
*****

WT 1876 TTGCAATTTGTATGTATAGATATATATCGATACTCAAATAAATTAATACATTGGTTTTAT
SD TTGCAATTTGTATGTATAGATATATATCGATACTCAAATAAATTAATACATTGGTTTTAT
NT AATAAATTTTATGTATAGATATATATCGATACTCAAATAAATTAATACATTGGTTTTAT
*****

WT 1936 TGATCATCTACCAAGATAAT
SD TGATCATCTACCAAGATAAT
NT TGATCATCTACCAAGATAAT
*****

```

**Figure S2** Nucleotide sequence of *Cyp6d2* alleles. Nucleotide positions relative to *Cyp6d2* transcription start site are indicated. Red: untranslated regions, Blue: protein coding regions, Black uppercase: upstream intergenic region, Black lowercase: introns. Asterisk below sequence indicates all three alleles are identical at this position. Highlighted SNPs predicted to change amino acid sequence. Two stocks for each allele were sequenced to confirm changes: WT (*P{SUPor-P}KG06046*, *P{SUPor-P}KG01596*), SD (*P{SUPor-P}KG02287*, *P{SUPor-P}KG06675*), NT (*Mi{ET1}CG3746*, *P{GT1}CG42565*). Alignment performed using Clustal Omega (Sievers et al. 2011) and boundaries are as defined by FlyBase.

Sievers F, Wilm A, Dineen D, Gibson TJ, Karplus K, Li W, Lopez R, McWilliam H, Remmert M, Ding JSO, et al. 2011. Fast, scalable generation of high-quality protein multiple sequence alignments using Clustal Omega. *Molecular Systems Biology* 7: 1–6.

**Table S1 Amino acid changes found in non-complementing region**

| Gene           | Mutation |
|----------------|----------|
| <i>CG30195</i> | I12S     |
| <i>CG34445</i> | D26V     |
|                | E55K     |
|                | K128Q    |
| <i>CG3746</i>  | E20G     |
|                | S44A     |
| <i>Cyp6d2</i>  | A459P/R  |
| <i>CG13511</i> | A49T     |
