# Supplementary material for: Common Variants of Drosophila melanogaster Cyp6d2 Cause Camptothecin Sensitivity and Synergize With Loss of Brca2
Source: PubMed Central journal article supplement (PMC3538347; doi:10.1534/g3.112.003996), 2013-01-01
Supplement: supp_3.1.91_FigureS1.pdf [file supp_3.1.91_FigureS1.pdf]

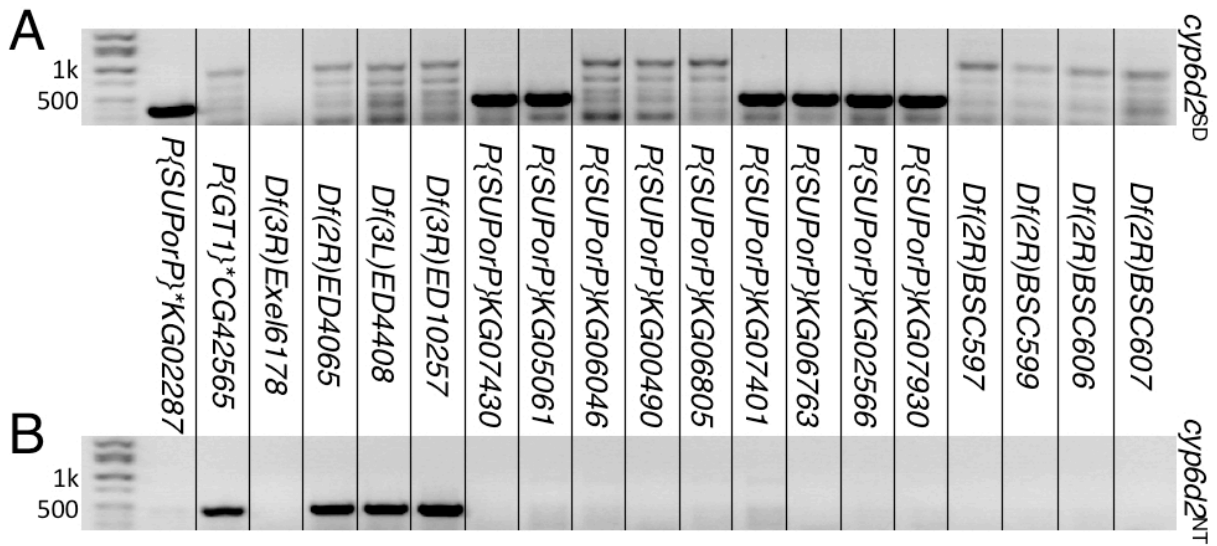

**Figure S1** Sample allele-specific PCR gel. (\*) indicates a precise excision of the insertion shown. Both PCR products are around 400 bp (see Materials and Methods). Sizes of molecular weight markers are indicated. (A) Allele-specific PCR gel for *cyp6d2<sup>SD</sup>* mutation. *P{SUPOrP}\*KG02287* serves as a positive control. (B) Allele-specific PCR gel for *cyp6d2<sup>NT</sup>* mutation. *P{GT1}\*CG42565* serves as a positive control.
