# Supplementary material for: Common Variants of Drosophila melanogaster Cyp6d2 Cause Camptothecin Sensitivity and Synergize With Loss of Brca2
Source: PubMed Central journal article supplement (PMC3538347; doi:10.1534/g3.112.003996), 2013-01-01
Supplement: supp_3.1.91_FigureS2.pdf [file supp_3.1.91_FigureS2.pdf]

WT -277 AAGAACCACATTCTATTTGGGGTCAACATATTGAAAGCATAATGATATGCTGTTGATATC  
SD AAGAACCACATTCTATTTGGGGTCAACATATTGAAAGCATAATGATATGCTGTTGATATC  
NT AAGAACCACATTCTATTTGGGGTCAACATATTGAAAGCATAATGATATGCTGTTGAAATC  
\*\*\*\*\* \*\*

WT -217 ATATACCTTTGAAATTAGTTGTGCATTTCTGTAATGTGCTCAACAGGTAGTCTCTTTGCT  
SD ATATACCTTTGAAATTAGTTGTGCATTTCTGTAATGTGCTCAACAGGTAGTCTCTTTGCT  
NT ATATACCTTTGAAATTAGTTGTGCATTTCTGTCATGGGCTCAACAGGTAGTCTCTTTGCT  
\*\*\*\*\* \*\*

WT -157 TTTTGCCGCCCTGCTTCCCTTGAAGAGTCGAAAGCTTTTTCCAGCTGAGAAGTCACTTGT  
SD TTTTGCCGCCCTGCT--CCCTGAAAGAGTCGAAAGCTTTTTCCAGCTGAGAAGTCACTTGT  
NT TTTTGCCGCCCTGCTTCCCTTGAAGAGTCGAAAGCTTTTTCCAGCTGAGAAGTCACTTGT  
\*\*\*\*\*

WT -97 TGATTTGCTGGAAGAGCAGCAGAGTCCAGAGAAAAAGACTCGGTTGTTGTAGCGCTTAT  
SD TGATTTGCTGGAAGAGCAGCAGAGTCCAGAGAAAAAGACTCGGTTGTTGTAGCGCTTAT  
NT TGATTTGCTGGAAGAGCAGCAGAGTCCAGAGAAAAAGACTCGGTTGTTGTAGCGCTTAT  
\*\*\*\*\*

WT -37 CGCGGGTTCTACGTCTATATAAGACCGATGCTCATGCAGTCTGAATTTGTACAGTTTGAAG  
SD CGCGGGTTCTACGTCTATATAAGACCGATGCTCATGCAGTCTGAATTTGTACAGTTTGAAG  
NT CGCGGGTTCTACGTCTATATAAGACCGATGCTCATGCAGTCTGAATTTGTACAGTTTGAAG  
\*\*\*\*\*

WT 24 GTGTGCATCGAGTAGTTTCGCAAATATTTACCACCTTTTAGAAATTTGTGATTTTCAATAC  
SD GTGTGCATCGAGTAGTTTCGCAAATATTTACCACCTTTTAGAAATTTGTGATTTTCAATAC  
NT GTGTGCATCGAGTAGTTTCGCAAATATTTACCACCTTTTAGAAATTTGTGATTTTCAATAC  
\*\*\*\*\*

WT 84 CAAAAGTTAGACTAGAGATTCTCAATATGTGGACCATTTCTCTGACGATCCTAATCGCGG  
SD CAAAAGTTAGACTAGAGATTCTCGATATGTGGACCATTTCTCTGACGATCCTAATCGCGG  
NT CAAAAGTTAGACTAGAGATTCTCAATATGTGGACCATTTCTCTGACGATCCTAATCGCGG  
\*\*\*\*\*

WT 144 GTCTGCTGTACAGATATGTGAAGCGGCACTACACTCACTGGCAGCGATTGGGAGTCGATG  
SD GTCTGCTGTACAGATATGTGAAGCGGCACTACACTCACTGGCAGCGATTGGGAGTCGATG  
NT GTCTGCTGTACAGATATGTGAAGCGGCACTACACTCACTGGCAGCGATTGGGAGTCGATG  
\*\*\*\*\*

WT 204 AGGAGCCGGCAAAGATTCCCTTTGGCGTAATGGATACTGTCATGAAGCAGGAACGAAGTT  
SD AGGAGCCGGCAAAGATTCCCTTTGGCGTAATGGATACTGTCATGAAGCAGGAACGAAGTT  
NT AGGAGCCGGCAAAGATTCCCTTTGGCGTAATGGATACTGTCATGAAGCAGGAACGAAGTT  
\*\*\*\*\*

WT 264 TGGGCATGGCTCTGGCTGATATATACGCCCGGCACGAGGGCAAATCGTTGGCATATACA  
SD TGGGCATGGCTCTGGCTGATATATACGCCCGGCACGAGGGCAAATCGTTGGCATATACA  
NT TGGGCATGGCTCTGGCTGATATATACGCCCGGCACGAGGGCAAATCGTTGGCATATACA  
\*\*\*\*\*

WT 324 TGTGTAACAAACGAAGTATCCTGATCCGAGATGCCCAATTGGCTCGCCAAATCATGACCA  
SD TGTGTAACAAACGAAGTATCCTGATCCGAGATGCCCAATTGGCTCGCCAAATCATGACCA  
NT TGTGTAACAAACGAAGTATCCTGATCCGAGATGCCCAATTGGCTCGCCAAATCATGACCA  
\*\*\*\*\*

WT 384 GCGATTTCCAGTTTCCACGATCGCGGGGTGTACGTGGACGAGGATAAGGACCCGTTGT  
SD GCGATTTCCAGTTTCCACGATCGCGGGGTGTACGTGGACGAGGATAAGGACCCGTTGT  
NT GCGATTTCCAGTTTCCACGATCGCGGGGTGTACGTGGACGAGGATAAGGACCCGTTGT  
\*\*\*\*\*

WT 444 CGGCCAACCTTTTTAACCTAAGAGGTGCTTCATGGCGAAATCTACGTCAGAACTTACGC  
SD CGGCCAACCTTTTTAACCTAAGAGGTGCTTCATGGCGAAATCTACGTCAGAACTTACGC  
NT CGGCCAACCTTTTTAACCTAAGAGGTGCTTCATGGCGAAATCTACGTCAGAACTTACGC  
\*\*\*\*\*

WT 504 CGTCGTTCTCCTCCGGCAAATAAAGGGCATGTTCCGGCACCATCGACGACGTGGGCGATA  
SD CGTCGTTCTCCTCCGGCAAATAAAGGGCATGTTCCGGCACCATCGACGACGTGGGCGATA  
NT CGTCGTTCTCCTCCGGCAAATAAAGGGCATGTTCCGGCACCATCGACGACGTGGGCGATA  
\*\*\*\*\*

WT 564 AGTTGGTGCAGCATTTGGAGGGGGCCCTTGACCAAAGCGATGAAGTGGAGATCAAGGATG  
SD AGTTGGTGCAGCATTTGGAGGGGGCCCTTGACCAAAGCGATGAAGTGGAGATCAAGGATG  
NT AGTTGGTGCAGCATTTGGAGGGGGCCCTTGACCAAAGCGATGAAGTGGAGATCAAGGATG  
\*\*\*\*\*

WT 624 TGATGACCACGTATGCGGTGGACATCATTGGGTCAGTCATTTTTGGCTTGGAGATAGACA  
SD TGATGACCACGTATGCGGTGGACATCATTGGGTCAGTCATTTTTGGCTTGGAGATAGACA  
NT TGATGACCACGTATGCGGTGGACATCATTGGGTCAGTCATTTTTGGCTTGGAGATAGACA  
\*\*\*\*\*

WT 684 GCTTCCGAAATCCAAAAAACGAGTTCCGCGAGATCAGCAGCTCTACGTCTAGGGATGAAT  
SD GCTTCCGAAATCCAAAAAACGAGTTCCGCGAGATCAGCAGCTCTACGTCTAGGGATGAAT  
NT GCTTCCGAAATCCAAAAAACGAGTTCCGCGAGATCAGCAGCTCTACGTCTAGGGATGAAT  
\*\*\*\*\*

WT 744 CTCTGCTGCTGAAGATTCACAATATGTCCATGTTTCATTTGTCCACCgtgagttcaaaaat  
SD CTCTGCTGCTGAAGATTCACAATATGTCCATGTTTCATTTGTCCACCgtgagttcaaaaat  
NT CTCTGCTGCTGAAGATTCACAATATGTCCATGTTTCATTTGTCCACCgtgagttcaaaaat  
\*\*\*\*\*

WT 804 aaccagggtatataatgttgggaatctttatctatatttataactaaatgttacagG  
SD aaccagggtatataatgttgggaatctttatctatatttataactaaatgttacagG  
NT aaccagggtatataatgttgggaatctttatctatatttataactaaatgttacagG  
\*\*\*\*\*

WT 864 ATTGCTAAGCTAATGAACCGCTTGGGCTACGAAAGCCGCATTTCTGACATCCCTGCGAGAC  
SD ATTGCTAAGCTAATGAACCGCTTGGGCTACGAAAGCCGCATTTCTGACATCCCTGCGAGAC  
NT ATTGCTAAGCTAATGAACCGCTTGGGCTACGAAAGCCGCATTTCTGACATCCCTGCGAGAC  
\*\*\*\*\*

WT 924 ATGATGAAGCGCACAATCGAGTTCCGGGAGGAGCACAACGTGGTGCGAAAGGACATGCTG  
SD ATGATGAAGCGCACAATCGAGTTCCGGGAGGAGCACAACGTGGTGCGAAAGGACATGCTG  
NT ATGATGAAGCGCACAATCGAGTTCCGGGAGGAGCACAACGTGGTGCGAAAGGACATGCTG  
\*\*\*\*\*

WT 984 CAGCTGCTGATCCGCCCTCCGAAATACGGGCAAGATTGGCGAGGACGACGACCAGGTGTGG  
SD CAGCTGCTGATCCGCCCTCCGAAATACGGGCAAGATTGGCGAGGACGACGACCAGGTGTGG  
NT CAGCTGCTGATCCGCCCTCCGAAATACGGGCAAGATTGGCGAGGACGACGACCAGGTGTGG  
\*\*\*\*\*

WT 1044 GACATGGAAACCGCACAGGAGCAGCTGAAGTCTATGTTCGATCGAGAAGATTGCCGCCAG  
SD GACATGGAAACCGCACAGGAGCAGCTGAAGTCTATGTTCGATCGAGAAGATTGCCGCCAG  
NT GACATGGAAACCGCACAGGAGCAGCTGAAGTCTATGTTCGATCGAGAAGATTGCCGCCAG  
\*\*\*\*\*

WT 1104 GCATTCTGTTCTACGTGGCGGGCTCGGAATCCACAGCTGCGGCGTCTGCCTTCACTCTC  
SD GCATTCTGTTCTACGTGGCGGGCTCGGAATCCACAGCTGCGGCGTCTGCCTTCACTCTC  
NT GCATTCTGTTCTACGTGGCGGGCTCGGAATCCACAGCTGCGGCGTCTGCCTTCACTCTC  
\*\*\*\*\*

WT 1164 TACGAGCTGTCCATGTATCCGGAAGTGTGAAGGAGGCGCAAGAAGAAGTGGATGCTGTG  
SD TACGAGCTGTCCATGTATCCGGAAGTGTGAAGGAGGCGCAAGAAGAAGTGGATGCTGTG  
NT TACGAGCTGTCCATGTATCCGGAAGTGTGAAGGAGGCGCAAGAAGAAGTGGATGCTGTG  
\*\*\*\*\*

WT 1224 CTGATGAAGCACAATCTGAAGCCCAAGGATAGGTTACCTACGAGGCGGTGCAGGACTTA  
SD CTGATGAAGCACAATCTGAAGCCCAAGGATAGGTTACCTACGAGGCGGTGCAGGACTTA  
NT CTGATGAAGCACAATCTGAAGCCCAAGGATAGGTTACCTACGAGGCGGTGCAGGACTTA

```

*****
WT   1284   AAGTTTCTGGACATCTGCATCATGGgtgggtttcacatagcattcagtttcaacgatcct
SD   1284   AAGTTTCTGGACATCTGCATCATGGgtgggtttcacatagcattcagtttcaacgatcct
NT   1284   AAGTTTCTGGACATCTGCATCATGGgtgggtttcacatagcattcagtttcaacgatcct
*****

WT   1344   tagttaaacgtatTTTTTgcagAAACCATTCGCAAATACCCCGGGCTACCATTCTCAATC
SD   1344   tagttaaacgtatTTTTTgcagAAACCATTCGCAAATACCCCGGGCTACCATTCTCAATC
NT   1344   tagttaaacgtatTTTTTgcagAAACCATTCGCAAATACCCCGGGCTACCATTCTCAATC
*****

WT   1404   GAGAGTGCACCGAAGATTATCCCGTACCTGGAAC TAATCACATCATAGCCAAGGGAACAC
SD   1404   GAGAGTGCACCGAAGATTATCCCGTACCTGGAAC TAATCACATCATAGCCAAGGGAACAC
NT   1404   GAGAGTGCACCGAAGATTATCCCGTACCTGGAAC TAATCACATCATAGCCAAGGGAACAC
*****

WT   1464   CCATTCTGATCTCGCTCTTTGGCATGCAGCGTGATCCCGTCTATTTTCCCAATCCCAATG
SD   1464   CCATTCTGATCTCGCTCTTTGGCATGCAGCGTGATCCCGTCTATTTTCCCAATCCCAATG
NT   1464   CCATTCTGATCTCGCTCTTTGGCATGCAGCGTGATCCCGTCTATTTTCCCAATCCCAATG
*****

WT   1524   GCTACGATCCCCATCGCTTCGATTCAAATAACATGAACTACGATCAGGCAGCTTATATGC
SD   1524   GCTACGATCCCCATCGCTTCGATTCAAATAACATGAACTACGATCAGGCAGCTTATATGC
NT   1524   GCTACGATCCCCATCGCTTCGATTCAATAACATGAACTACGATCAGGCAGCTTATATGC
*****

WT   1584   CTTTGGAGAGGGTCCTAGGCACTGCATAGgtaaagatgtgttttgtaccagtggctcttg
SD   1584   CTTTGGAGAGGGTCCTAGGCACTGCATAGgtaaagatgtgttttgtaccagtggctcttg
NT   1584   CTTTGGAGAGGGTCCTAGGCACTGCATAGgtaaagatgtgttttgtaccagtggctcttg
* *****

WT   1644   tcttcttctgatcctgttctcttaattctttgccccaaagCTCTTCGCATGGGAAAAGTC
SD   1644   tcttcttctgatcctgttctcttaattctttgccccaaagCTCTTCGCATGGGAAAAGTC
NT   1644   tcttcttctgatcctgttctcttaattctttgccccaaagCTCTTCGCATGGGAAAAGTC
*****

WT   1704   AACTCCAAGGTGGCGGTGGCTAAGATTTTGGCCAATTTTGATCTGGTTCAATCTCCACGC
SD   1704   AACTCCAAGGTGGCGGTGGCTAAGATTTTGGCCAATTTTGATCTGGTTCAATCTCCACGC
NT   1704   AACTCCAAGGTGGCGGTGGCTAAGATTTTGGCCAATTTTGATCTGGTTCAATCTCCACGC
*****

WT   1764   AAGGAGGTGGAGTTCCGTTTCGATGCCGCCCTGTTTTAGTGACCAAGGAGCCGTTGAAG
SD   1764   AAGGAGGTGGAGTTCCGTTTCGATGCCGCCCTGTTTTAGTGACCAAGGAGCCGTTGAAG
NT   1764   AAGGAGGTGGAGTTCCGTTTCGATGCCGCCCTGTTTTAGTGACCAAGGAGCCGTTGAAG
*****

WT   1824   CTGCGCTTGACCAAGAGAAAAGTAAATCAAAAATATGTGGCTATTGTATG-----TAA
SD   1824   CTGCGCTTGACCAAGAGAAAAGTAAATCAAAAATATGTGGCTATTGTATG-----TAA
NT   1824   CTGCGCTTGACCAAGAGAAAAGTAAATCAAAAATATGTGGCTAAAAGCGAATATACTATAT
*****

WT   1876   TTGCAATTTGTATGTATAGATATATATCGATACTCAAATAAATTAATACATTGGTTTTAT
SD   1876   TTGCAATTTGTATGTATAGATATATATCGATACTCAAATAAATTAATACATTGGTTTTAT
NT   1876   AATAAATTTTATGTATAGATATATATCGATACTCAAATAAATTAATACATTGGTTTTAT
*****

WT   1936   TGATCATCTACCAAGATAAT
SD   1936   TGATCATCTACCAAGATAAT
NT   1936   TGATCATCTACCAAGATAAT
*****

```

**Figure S2** Nucleotide sequence of *Cyp6d2* alleles. Nucleotide positions relative to *Cyp6d2* transcription start site are indicated. Red: untranslated regions, Blue: protein coding regions, Black uppercase: upstream intergenic region, Black lowercase: introns. Asterisk below sequence indicates all three alleles are identical at this position. Highlighted SNPs predicted to change amino acid sequence. Two stocks for each allele were sequenced to confirm changes: WT (*P{SUPor-P}KG06046*, *P{SUPor-P}KG01596*), SD (*P{SUPor-P}KG02287*, *P{SUPor-P}KG06675*), NT (*Mi{ET1}CG3746*, *P{GT1}CG42565*). Alignment performed using Clustal Omega (Sievers et al. 2011) and boundaries are as defined by FlyBase.

Sievers F, Wilm A, Dineen D, Gibson TJ, Karplus K, Li W, Lopez R, McWilliam H, Remmert M, Ding JSO, et al. 2011. Fast, scalable generation of high-quality protein multiple sequence alignments using Clustal Omega. *Molecular Systems Biology* 7: 1–6.
