# Supplementary material for: Common Variants of Drosophila melanogaster Cyp6d2 Cause Camptothecin Sensitivity and Synergize With Loss of Brca2
Source: PubMed Central journal article supplement (PMC3538347; doi:10.1534/g3.112.003996), 2013-01-01
Supplement: supp_3.1.91_TableS1.pdf [file supp_3.1.91_TableS1.pdf]

**Table S1 Amino acid changes found in non-complementing region**

| Gene           | Mutation |
|----------------|----------|
| <i>CG30195</i> | I12S     |
| <i>CG34445</i> | D26V     |
|                | E55K     |
|                | K128Q    |
| <i>CG3746</i>  | E20G     |
|                | S44A     |
| <i>Cyp6d2</i>  | A459P/R  |
| <i>CG13511</i> | A49T     |
